# Supplementary material for: Prolonged Boarding and Racial Discrimination and Dissatisfaction Among Emergency Department Patients
Source: PubMed Central journal article supplement (PMC11406394; doi:10.1001/jamanetworkopen.2024.33429), 2024-09-16
Supplement: jamanetwopen-e2433429-s001.pdf [file jamanetwopen-e2433429-s001.pdf]

## Supplemental Online Content

Olson RM, Fleurant A, Beuparlant S, et al. Prolonged boarding and racial discrimination and dissatisfaction among emergency department patients. *JAMA Netw Open*. 2024;7(9):e2433429. doi:10.1001/jamanetworkopen.2024.33429

**eAppendix 1.** Discrimination in Medical Settings (DMS) Scale

**eAppendix 2.** Adapted Picker Patient Experience (PPE-15) Questionnaire

**eTable 1.** Other Self-Reported Races and Ethnicities

**eTable 2.** Frequencies and Percentages of Discrimination While Boarding by Race and Ethnicity, by DMS Scale

**eTable 3.** Frequencies and Proportions of Dissatisfaction With Care While Boarding by Race and Ethnicity, by Adapted PPE-15

**eTable 4.** Sensitivity Analysis: Associations of Discrimination During ED Boarding (Categorical Race and Ethnicity)

**eTable 5.** Sensitivity Analysis: Associations of Dissatisfaction With Care During ED Boarding (Categorical Race and Ethnicity)

This supplemental material has been provided by the authors to give readers additional information about their work.

**eAppendix 1. Discrimination in Medical Settings (DMS) Scale**

|                                                                                                    |       |        |           |                  |        |
|----------------------------------------------------------------------------------------------------|-------|--------|-----------|------------------|--------|
| 1. How often do you feel you are treated with less courtesy than other people?                     | Never | Rarely | Sometimes | Most of the time | Always |
| 2. How often do you feel you are treated with less respect than other people?                      | Never | Rarely | Sometimes | Most of the time | Always |
| 3. How often do you feel you receive poorer service than others?                                   | Never | Rarely | Sometimes | Most of the time | Always |
| 4. How often do you feel your doctor or nurse acts as if he or she thinks you are not smart?       | Never | Rarely | Sometimes | Most of the time | Always |
| 5. How often do you feel your doctor or nurse acts as if he or she is afraid of you?               | Never | Rarely | Sometimes | Most of the time | Always |
| 6. How often do you feel your doctor or nurse acts as if he or she is better than you?             | Never | Rarely | Sometimes | Most of the time | Always |
| 7. How often do you feel you feel like a doctor or nurse is not listening to what you were saying? | Never | Rarely | Sometimes | Most of the time | Always |

## **eAppendix 2. Adapted Picker Patient Experience (PPE-15) Questionnaire**

Please reflect on your experience while boarding in the Emergency Room during this current hospitalization.

1. When you had important questions to ask a doctor, did you get answers that you could understand?

Yes, always/Yes, sometimes/No/I had no need to ask

2. When you had important questions to ask a nurse, did you get answers that you could understand?

Yes, always/Yes, sometimes/No/I had no need to ask

3. Sometimes in a hospital, one doctor or nurse will say one thing and another will say something quite different. Did this happen to you?

Yes, often/Yes, sometimes/No

4. If you had any anxieties or fears about your condition or treatment, did a doctor discuss them with you?

Yes, completely/Yes, to some extent/No/I didn't have any anxieties or fears

5. Did doctors talk in front of you as if you weren't there?

Yes, often/Yes sometimes/No

6. Did you want to be more involved in decisions made about your care and treatment?

Yes, definitely/Yes, to some extent/No

7. Overall, did you feel you were treated with respect and dignity while you were boarding in the Emergency Room?

Yes, always/Yes, sometimes/No

8. If you had any anxieties or fears about your condition or treatment, did a nurse discuss them with you?

Yes, completely/Yes, to some extent/No/I didn't have any anxieties or fears

9. Did you find someone on the hospital staff to talk to about your concerns?

Yes, definitely/Yes, to some extent/No/I had no concerns

10. Were you ever in pain?

Yes/No

If yes...

Do you think the hospital staff did everything they could to help control your pain?

Yes, definitely/Yes, to some extent/No

13. Did a member of staff explain the purpose of the medicines you were to take in a way you could understand?

Yes, completely/Yes, to some extent/No/I didn't need an explanation/I had no medicines

14. Did a member of staff tell you about medication side effects to watch for?

Yes, completely/Yes, to some extent/No/I didn't need an explanation

**eTable 1. Other Self-Reported Races and Ethnicities**

|                    | <i>n</i> |
|--------------------|----------|
| African            | 3        |
| "All of the races" | 1        |
| American           | 1        |
| Armenian           | 1        |
| Asian              | 11       |
| Brazilian          | 1        |
| Cape Verdean       | 1        |
| Cuban              | 1        |
| Ethiopian          | 1        |
| Haitian            | 1        |
| Irish              | 1        |
| Jewish             | 1        |
| Mediterranean      | 1        |
| Middle Eastern     | 3        |
| Multiracial        | 3        |
| Portuguese         | 1        |
| Puerto Rican       | 1        |
| Native American    | 3        |
| Native West Indian | 1        |
| Total              | 37       |

**Table 2. Frequencies and Percentages of Discrimination While Boarding by Race and Ethnicity, by DMS Scale**

|                                                          | <b>Total,<br/>N</b> | <b>Non-<br/>Hispanic<br/>White</b> | <b>Marginaliz<br/>ed race<br/>and<br/>ethnicity</b> | NH<br>Black  | Hispani<br>c | Other        | P<br>value <sup>1</sup> |
|----------------------------------------------------------|---------------------|------------------------------------|-----------------------------------------------------|--------------|--------------|--------------|-------------------------|
| <b>Reason for<br/>experience of<br/>discrimination</b>   |                     |                                    |                                                     |              |              |              |                         |
| Treated with<br>less courtesy,<br>No. (%)                | 94<br>(17.9)        | 31 (12.6)                          | 62 (22.6)                                           | 39<br>(26.2) | 13<br>(14.8) | 10<br>(27.0) | <b>.003</b>             |
| Treated with<br>less respect, No.<br>(%)                 | 82<br>(15.7)        | 26 (10.6)                          | 54 (19.7)                                           | 29<br>(19.5) | 14<br>(15.9) | 11<br>(29.7) | <b>.004</b>             |
| Received poorer<br>service, No. (%)                      | 74<br>(14.1)        | 28 (11.4)                          | 44 (16.1)                                           | 27<br>(18.1) | 10<br>(11.4) | 7<br>(18.9)  | .12                     |
| Medical staff<br>treated me as<br>less smart, No.<br>(%) | 82<br>(15.7)        | 28 (11.4)                          | 53 (19.4)                                           | 33<br>(22.3) | 10<br>(11.4) | 10<br>(27.0) | <b>.01</b>              |
| Medical staff<br>acted afraid of<br>me, No. (%)          | 21<br>(4.0)         | 8 (3.3)                            | 13 (4.7)                                            | 10 (6.7)     | 0 (0)        | 3<br>(8.11)  | .39                     |
| Medical staff<br>acted better<br>than me                 | 62<br>(11.8)        | 29 (11.8)                          | 33 (12.0)                                           | 21<br>(14.1) | 5 (5.7)      | 7<br>(18.9)  | .93                     |
| Medical staff<br>didn't listen to<br>me, No. (%)         | 112<br>(21.3)       | 54 (22.0)                          | 56 (20.4)                                           | 32<br>(21.5) | 13<br>(14.8) | 11<br>(29.7) | .67                     |

<sup>1</sup>. Comparing NH White vs. marginalized race and ethnicity

**eTable 3: Frequencies and Proportions of Dissatisfaction With Care While Boarding by Race and Ethnicity, by Adapted PPE-15**

|                                               | Total      | NH White  | Marginalized race and ethnicity | NH Black  | Hispanic  | Other     | P value |
|-----------------------------------------------|------------|-----------|---------------------------------|-----------|-----------|-----------|---------|
| <b>Information and education</b>              |            |           |                                 |           |           |           |         |
| Doctors' answers to questions not clear       | 91 (18.1)  | 42 (17.1) | 49 (17.9)                       | 28 (18.8) | 12 (13.6) | 9 (24.3)  | 0.81    |
| Nurses' answers to questions not clear        | 78 (14.9)  | 33 (13.4) | 42 (15.3)                       | 25 (16.8) | 9 (10.2)  | 8 (21.6)  | 0.54    |
| <b>Coordination of care</b>                   |            |           |                                 |           |           |           |         |
| Doctors gave conflicting information          | 189 (36.0) | 81 (32.9) | 107 (39.1)                      | 65 (43.6) | 30 (34.1) | 12 (32.4) | 0.15    |
| Nurse gave conflicting information            | 98 (18.7)  | 41 (16.7) | 55 (20.1)                       | 31 (20.8) | 14 (15.9) | 10 (27.0) | 0.32    |
| <b>Physical comfort</b>                       |            |           |                                 |           |           |           |         |
| Staff didn't do enough to control pain        | 101 (19.2) | 50 (20.3) | 48 (17.5)                       | 31 (20.8) | 6 (6.8)   | 11 (29.3) | 0.41    |
| <b>Emotional support</b>                      |            |           |                                 |           |           |           |         |
| Doctor didn't discuss my anxieties/fears      | 136 (25.9) | 67 (27.2) | 66 (24.1)                       | 41 (27.5) | 17 (19.3) | 8 (21.6)  | 0.41    |
| Nurse didn't discuss my anxieties/fears       | 136 (25.9) | 65 (26.4) | 68 (24.8)                       | 40 (26.9) | 20 (22.7) | 8 (21.6)  | 0.68    |
| Not easy to find someone to discuss concerns  | 121 (23.1) | 57 (23.2) | 62 (22.6)                       | 33 (22.2) | 20 (22.7) | 9 (24.3)  | 0.88    |
| <b>Respect for patient preferences</b>        |            |           |                                 |           |           |           |         |
| Doctors sometimes talked as if I wasn't there | 59 (11.2)  | 25 (10.2) | 34 (12.4)                       | 20 (13.4) | 9 (10.2)  | 5 (13.5)  | 0.42    |

|                                                                 |            |           |            |           |           |           |                 |
|-----------------------------------------------------------------|------------|-----------|------------|-----------|-----------|-----------|-----------------|
| Not always treated with respect or dignity                      | 72 (13.7)  | 28 (11.4) | 42 (15.3)  | 25 (16.8) | 9 (10.2)  | 8 (21.6)  | 0.19            |
| Not sufficiently involved in decisions about treatment and care | 202 (38.5) | 72 (29.3) | 128 (46.7) | 62 (41.6) | 45 (51.1) | 21 (56.8) | <b>&lt;.001</b> |
| <b>Continuity and transition</b>                                |            |           |            |           |           |           |                 |
| Purpose of medicines not explained                              | 52 (9.9)   | 22 (8.9)  | 29 (10.6)  | 18 (12.1) | 4 (4.6)   | 7 (18.9)  | 0.53            |
| Side effects of medicines not explained                         | 119 (24.1) | 62 (27.7) | 55 (20.6)  | 32 (21.6) | 12 (14.5) | 10 (30.6) | 0.07            |



**eTable 4: Sensitivity Analysis: Associations of Discrimination During ED Boarding (Categorical Race and Ethnicity)**

| Boarding Time (hrs) | White             |         | Black            |         | Hispanic          |         |
|---------------------|-------------------|---------|------------------|---------|-------------------|---------|
|                     | aOR (95%)         | P value | aOR (95%)        | P value | aOR (95%)         | P value |
| <4                  | 1 [Reference]     |         | 1 [Reference]    |         | 1 [Reference]     |         |
| 4-24                | .95 (0.45-2.00)   | 0.89    | 1.08 (.43-2.71)  | 0.86    | 2.91 (.62-13.54)  | 0.17    |
| >24                 | 1.65 (0.79- 3.42) | 0.18    | 3.00 (1.18-7.59) | 0.02    | 3.12 (0.66-14.67) | 0.15    |

**eTable 5: Sensitivity Analysis: Associations of Dissatisfaction With Care During ED Boarding (Categorical Race and Ethnicity)**

| Boarding Time (hrs) | White            |         | Black            |         | Hispanic         |         |
|---------------------|------------------|---------|------------------|---------|------------------|---------|
|                     | aOR (95%)        | P value | aOR (95%)        | P value | aOR (95%)        | P value |
| <4                  | 1 [Reference]    |         | 1 [Reference]    |         | 1 [Reference]    |         |
| 4-24                | 1.13 (0.55-2.32) | 0.75    | 1.51 (0.60-3.81) | 0.38    | 0.30 (0.05-1.72) | 0.18    |
| >24                 | 1.68 (0.79-3.60) | 0.18    | 5.11 (1.59-16.4) | 0.006   | 0.33 (0.06-1.9)  | 0.22    |
