# Supplementary material for: Prolonged Boarding and Racial Discrimination and Dissatisfaction Among Emergency Department Patients
Source: PubMed Central journal article supplement (PMC11406394; doi:10.1001/jamanetworkopen.2024.33429), 2024-09-16
Supplement: jamanetwopen-e2433429-s002.pdf [file jamanetwopen-e2433429-s002.pdf]

## Data Sharing Statement

Olson. Prolonged Boarding and Racial Discrimination and Dissatisfaction Among Emergency Department Patients. *JAMA Netw Open*. Published September 16, 2024.  
doi:10.1001/jamanetworkopen.2024.33429

### Data

**Data available:** No
